# Supplementary material for: An Environmental Scan and Qualitative Inquiry of Cancer Patient Navigation Services in North Carolina
Source: Research Square preprint supplement (doi:10.21203/rs.3.rs-4189013/v1), 2024-04-12
Supplement: Supplementary file 1 [file 8d8cf31968ac347260de80db.docx]

| **Appendix A: Environmental Scan of Cancer Patient Navigation in North Carolina: Publicly Available Online Information Search Guide and Structured Interview Guide** |
| --- |
| **Publicly Available Online Information Search Guide** |
| - Hospital System Identifier (Name, Code, etc.) - Does the hospital system have a patient navigation section of their website for cancer patients? - If the hospital system has a patient navigation section of their website for cancer patients, how many clicks does it take to get from the main hospital home page to the cancer navigation page? - If the hospital system has a patient navigation section of their website for cancer patients, how organized and clear is this page? (i.e., well organized and clear, well organized but unclear, disorganized but clear, or disorganized and unclear) - If the hospital system has a patient navigation section of their website for cancer patients, does it state the types of services offered? - If the hospital system has a patient navigation section of their website for cancer patients, does it state if patient navigation services are offered to all patients? If not, does it outline any groups of patients to which patient navigation services are offered? - If the hospital system has a patient navigation section of their website for cancer patients, does it outline who acts as patient navigators? (i.e., nurse navigators, lay navigators, volunteer navigators, other) - If the hospital system has a patient navigation section of their website for cancer patients, are there any contact numbers or emails of patient navigation staff for patients to reach out to? |
| **Structured Interview Guide** |
| - Hospital System Identifier (Name, Code, Etc.) - Date, Time, and Place of Interview - Does your organization offer patient navigation services to cancer patients? - What does patient navigation look like to your organization? - What patient navigation services are offered at your organization? - Are patient navigation services offered to all cancer patients? If not, which groups of patients are offered patient navigation services? - Who acts as patient navigators? (i.e., nurse navigators, lay navigators, volunteer navigators, other) - From your perspective, what are the strengths of the current patient navigation system at your hospital? - When did your organization introduce patient navigation services for your cancer patients? - In what direction do you see patient navigation at your organization going? - Do you have any additional comments? - Would you like to receive a summary report of the information collected? - After reviewing the report, the hospital system can choose whether they would like to be named or have their identity blinded. |
|  |
